# Supplementary material
Source: publisher figshare collection journal article supplement (https://frontiersin.figshare.com/ndownloader/files/16446491)
Supplement: Supplementary file 1 [file 16446491]

Supplementary Material

Heavy-metal-resistant microorganisms in deep-sea sediments disturbed by mining activity: an application towards the development of an experimental in vitro systems.

**Benjamin Gillard1, 2, *, Damianos Chatzievangelou2, Laurenz Thomsen2, Matthias S. Ullrich3**

1MARUM – Center for Marine Environmental Sciences, University of Bremen, Bremen, Germany

2Jacobs University Bremen, Department of Physics and Earth Science, Bremen, Germany

3Jacobs University Bremen, Department of Life Science and Chemestry, Bremen, Germany

*** Correspondence:**Gillard Benjamin
[b.gillard@jacobs-university.de](mailto:b.gillard@jacobs-university.de)

**List of Contents:**

**Table S1. Sampling location details**

**Table S2. 16S rRNA BLASTN analysis results**

**Table S3. Combinations of phenotypical test giving a unique bacterial identification**

**Table S4. Mn cell trafficking putative genes sequences accession number list**

**Table S1. Sampling location details**

| Probe Nr. | Date  (UTC) | Latitude  (N) | Longitude  (W) | Water depth  (m) | Core length  (cm) |
| --- | --- | --- | --- | --- | --- |
| SO240-14MUC | 11.05.15 | 13°10,528' | 118°10,108' | 4332 | 10 |
| SO240-95MUC | 05.06.15 | 11°49,262' | 117°13,197' | 4150 | - |

**Table S2. 16S rRNA BLASTN analysis results**

| Sample | Laboratory  Reference | GenBank  accession Nr. | Isolation depth  (cm) | Closest phylogenetic relative  (Accession no., organism) | Homology (%) |
| --- | --- | --- | --- | --- | --- |
| 14 MUC | SO240BG01 | MK254646 | Water | *NR_043546.1, Arthrobacter subterraneus* strain M1406 | 99 |
| SO240BG02 | MK254647 | 6 -7 | *NR_116685.1, Dietzia maris* strain DSM 43672 | 99 |
| SO240BG03 | MK254648 | 8 - 9 | 99 |
| SO240BG04 | MK254649 | 0 - 1 | *NR_028741.1, Erythrobacter citreus* strain RE35F/1 | 99 |
| SO240BG05 | MK254650 | 1 - 2 | 99 |
| SO240BG06 | MK254651 | 2 - 3 | 99 |
| SO240BG07 | MK254652 | 5 - 6 | 99 |
| SO240BG08 | MK254653 | 7 - 8 | 99 |
| SO240BG09 | MK254654 | Water | NR_042063.1, *Halomonas aquamarina* strain DSM 30161 | 99 |
| SO240BG10 | MK254655 | 0 - 1 | NR_042066.1, *Halomonas meridiana* strain DSM 5425 | 99 |
| SO240BG11 | MK254656 | 1 - 2 | 99 |
| SO240BG12 | MK254657 | 2 - 3 | 99 |
| SO240BG13 | MK254658 | 3 - 4 | 99 |
| SO240BG14 | MK254659 | 4 - 5 | 99 |
| SO240BG15 | MK254660 | 6 - 7 | 99 |
| SO240BG16 | MK254661 | 7 - 8 | 99 |
| SO240BG17 | MK254662 | 3 - 4 | NR_028924.1, *Kocuria polaris* strain CMS 76or | 99 |
| SO240BG18 | MK254663 | 5 - 6 | 99 |
| SO240BG19 | MK254664 | 0 - 1 | NR_114307.1, *Loktanella cinnabarina* strain LL-001 | 99 |
| SO240BG20 | MK254665 | Water | NR_025799.1, *Marinobacter flavimaris* isolate: D1-1M | 99 |
| SO240BG21 | MK254666 | 1 - 2 | NR_125458.1, *Pseudoalteromonas shioyasakiensis* strain SE3 | 99 |
| SO240BG22 | MK254667 | 2 - 3 | 99 |
| SO240BG23 | MK254668 | 3 - 4 | 99 |
| SO240BG24 | MK254669 | 4 - 5 | 99 |
| SO240BG25 | MK254670 | 5 - 6 | 99 |
| SO240BG26 | MK254671 | 6 - 7 | 99 |
| SO240BG27 | MK254672 | 8 - 9 | 99 |
| SO240BG28 | MK254673 | 9 -10 | 99 |
| SO240BG29 | MK254674 | 1 - 2 | NR_041715.1, *Pseudomonas stutzeri* strain 13635O | 99 |
| SO240BG30 | MK254675 | 3 - 4 | 99 |
| SO240BG31 | MK254676 | 7 - 8 | 99 |
| 95 MUC | SO240BG32 | MK254677 | Nodule 1 - 2 | AM110948.1, *Bacillus subtilis* isolate B-3141 | 99 |
| SO240BG33 | MK254678 | Nodule 1 - 2 | *NR_028741.1, Erythrobacter citreus* strain RE35F/1 | 99 |
| SO240BG34 | MK254679 | Nodule 0 - 1 | NR_042063.1, Halomonas aquamarina strain DSM 30161 | 99 |
| SO240BG35 | MK254680 | Nodule 0 - 1 | NR_027219.1, Halomonas axialensis strain Althf1 | 99 |
| SO240BG36 | MK254681 | Nodule 1 - 2 | 99 |
| SO240BG37 | MK254682 | Nodule 1 - 2 | NR_042066.1, Halomonas meridiana strain DSM 5425 | 99 |
| SO240BG38 | MK254683 | Nodule 0 - 1 | NR_041715.1, Pseudomonas stutzeri strain ATCC 17588 | 99 |
| SO240BG39 | MK254684 | Nodule 1 - 2 | 99 |
| SO240BG40 | MK254685 | Nodule 1 - 2 | KU904404.1, Rhodococcus erythropolis strain JA30 | 99 |

**Table S3. Combinations of phenotypical test giving a unique bacterial identification**

| **Test** | **Arthrobacter subterraneus**  **(SO240BG6)** | **Bacillus subtilis**  **(SO240BG40)** | **Dietzia Maris**  **(SO240BG8)** | **Dietzia Maris**  **(SO240BG10)** | **Erythrobacter citreus**  **(SO240BG22)** |
| --- | --- | --- | --- | --- | --- |
|
| **General** | Motility & Pigmentation  Gram & Pigmentation | Gram & Pigmentation  Gram & Motility |  |  | Pigmentation |
| **API-20NE** |  |  |  |  | Malic acid |
| **API-20NE + general** | Nitrite reduction & Pigmentation  D-mannose & Pigmentation  Capric acid & Pigmentation  Adipic acid & Pigmentation  Trisodium citrate & Pigmentation |  |  |  | D-glucose & Motility  D-mannitol & Motility  D-maltose & Motility  Potassium gluconate & Motility |
| **API-ZYM** |  | Esterase/ Alkaline phosphatase  α-Glucosidase & Alkaline phosphatase  Esterase lipase & Alkaline phosphatase |  | Valine arylamidase & N-acetyl-glucosamine  Cystine arylamidase & N-acetyl-glucosamine  Valine arylamidase & Lipase  Cystine arylamidase & Valine arylamidase  Acid phosphatase & Valine arylamidase  α-Glucosidase & Valine arylamidase  N-acetyl-β-glucosaminidase & Valine arylamidase | α-Glucosidase & Cystine arylamidase  N-acetyl-β-glucosaminidase & Potassium gluconate |
| **API-ZYM + general** | Esterase &Pigmentation  Lipase & Pigmentation  α-Glucosidase & Pigmentation  Adipic acid & Gram  Esterase & Gram | Alkaline phosphatase & Gram  α-Glucosidase & Gram | Trisodium citrate & Pigmentation  Valine arylamidase & Pigmentation  Cystine arylamidase & Pigmentation | Valine arylamidase & Pigmentation  Cystine arylamidase & Pigmentation  Valine arylamidase & Motility  Valine arylamidase & Gram  Cystine arylamidase & Gram | α-Glucosidase & Motility |
| **20NE +ZYM** | N-acetyl-glucosamine & D-mannose  Adipic acid & D-mannose  Adipic acid & D-maltose  Adipic acid & Potassium gluconate  Esterase & Adipic acid |  |  | Valine arylamidase & D-glucose  Valine arylamidase & D-mannose  Cystine arylamidase & D-mannose  Valine arylamidase & D-mannitol  Valine arylamidase & D-maltose  Valine arylamidase & Potassium gluconate  Valine arylamidase & Adipic acid  Trisodium citrate & Pigmentation | Lipase & D-glucose  Valine arylamidase & D-glucose  Cystine arylamidase & D-glucose  Acid phosphatase & D-glucose  N-acetyl-β-glucosaminidase & D-glucose  Cystine arylamidase & L-arabinose  Lipase & D-mannitol  Cystine arylamidase & D-mannitol  Cystine arylamidase & D-maltose/Potassium gluconate  Cystine arylamidase & Adipic acid |

**Table S3. Continued**

| **Test** | **Halomonas aquamarina**  **(SO240BG31)** | **Halomonas axialensis**  **(SO240BG23)** | **Halomonas meridiana**  **(SO240BG3)** | **Halomonas meridiana**  **(SO240BG14)** | **Kocuria polaris**  **(SO240BG21)** | **Loktanella cinnabarina**  **(SO240BG12)** |
| --- | --- | --- | --- | --- | --- | --- |
| **General** | Pigmentation |  |  |  | Pigmentation | Motility & Pigmentation |
| **API-20NE** | D-mannitol & D-glucose  Capric acid & Hydrolysis of Esculin  D-maltose & D-mannitol  Capric acid & D-mannitol  Adipic acid & D-mannitol  Trisodium citrate & D-mannitol |  |  |  |  |  |
| **API-20NE + general** |  |  |  |  |  |  |
| **API-ZYM** | Trypsin & Lipase |  |  |  |  | Leucine-arylamidase  α-Mannosidase  β-Glucuronidase  β-Glucosidase & Lipase  β-Galactosidase  Trypsin & Cystine arylamidase  α-chymotripsin & Cystine arylamidase  Acid phosphatase & Cystine arylamidase  β-Glucosidase & Cystine arylamidase  α-chymotripsin & Trypsin  β-Glucosidase & Trypsin  Acid phosphatase & α-chymotripsin  β-Glucosidase & α-chymotripsin  β-Glucosidase & Acid phosphatase |
| **API-ZYM + general** |  |  |  |  |  | Cystine arylamidase & Pigmentation  β-Glucosidase & Gram  Cystine arylamidase & Pigmentation  β-Glucosidase & Pigmentation  Alkaline phosphatase & Motility  Trypsin & Motility  α-chymotripsin & Motility |
| **20NE +ZYM** | Trypsin & L-arabinose  Trypsin & D-mannitol  α-Glucosidase & D-mannitol |  |  | Alkaline phosphatase & Nitrite reduction  Esterase/Esterase lipase & Nitrite reduction  Acid phosphatase & Nitrite reduction |  | β-Glucosidase & Nitrite reduction  Cystine arylamidase & Hydrolysis of Esculin  Trypsin & Hydrolysis of Esculin  β-Glucosidase & L-arabinose  Cystine arylamidase & Capric acid  α-chymotripsin & Capric acid  α-chymotripsin & Adipic acid  Cystine arylamidase & Trisodium citrate  α-chymotripsin & Trisodium citrate  β-Glucosidase & Urease  β-Glucosidase & Phenylacetic acid |

**Table S3. Continued**

| **Test** | **Marinobacter flavimaris**  **(SO240BG9)** | **Pseudoalteromonas shioyasakiensis**  **(SO240BG4)** | **Pseudoalteromonas shioyasakiensis**  **(SO240BG20)** | **Pseudomonas stutzeri**  **(SO240BG43)** | **Rhodococcus erythropolis**  **(SO240BG28)** |
| --- | --- | --- | --- | --- | --- |
| **General** |  |  |  | Motility & Pigmentation  Gram & Pigmentation | Pigmentation |
| **API-20NE** | Malic acid & D-glucose | D-maltose & Hydrolysis of Esculin  D-maltose & Hydrolysis of Gelatin  D-maltose & D-glucose  D-maltose & L-arabinose  D-maltose & D-mannitol |  |  | Urease  Phenylacetic acid  L-arabinose & Nitrite reduction |
| **API-20NE + general** | D-glucose & Pigmentation  D-mannitol & Pigmentation  D-glucose & Motility |  |  | Nitrite reduction & Pigmentation  D-mannose & Pigmentation  Capric acid & Pigmentation  Adipic acid & Pigmentation  Trisodium citrate & Pigmentation | Nitrite reduction & Motility  Lipase & Motility  Nitrite reduction & Gram |
| **API-ZYM** | D-glucose & Pigmentation  D-mannitol & Pigmentation  D-glucose & Motility  Acid phosphatase & Lipase  N-acetyl-β-glucosaminidase & Lipase  Cystine arylamidase & Valine arylamidase  Acid phosphatase & Valine arylamidase  α-Glucosidase & Valine arylamidase  N-acetyl-β-glucosaminidase & Valine arylamidase  N-acetyl-β-glucosaminidase & α-Glucosidase | α-chymotripsin & Leucine-arylamidase  α-chymotripsin & α-Mannosidase  α-chymotripsin & β-Glucuronidase  α-chymotripsin & β-Galactosidase  α-chymotripsin & Cystine arylamidase  α-chymotripsin & Trypsin  Acid phosphatase & α-chymotripsin  β-Glucosidase & α-chymotripsin  α-chymotripsin & Alkaline phosphatase  α-chymotripsin & Esterase  α-chymotripsin & Esterase lipase | α-Glucosidase & N-acetyl-glucosamine |  | β-Glucosidase & N-acetyl-glucosamine  β-Glucosidase & Alkaline phosphatase  β-Glucosidase & Esterase  β-Glucosidase & Esterase lipase  β-Glucosidase & Lipase  β-Glucosidase & Leucine-arylamidase  β-Glucosidase & α-Mannosidase  β-Glucosidase & β-Glucuronidase  β-Glucosidase & β-Galactosidase  β-Glucosidase & Cystine arylamidase  β-Glucosidase & Trypsin  β-Glucosidase & α-chymotripsin  β-Glucosidase & Acid phosphatase  N-acetyl-β-glucosaminidase & β-Glucosidase |
| **API-ZYM + general** | Valine arylamidase & Pigmentation  Valine arylamidase & Motility  Valine arylamidase & Gram | α-chymotripsin & Motility |  | Esterase/Esterase lipase & Pigmentation  Lipase & Pigmentation  Acid phosphatase & Pigmentation  α-Glucosidase & Pigmentation | Lipase & Motility  Lipase & Gram  β-Glucosidase & Gram |
| **20NE +ZYM** | Lipase & D-glucose  Valine arylamidase & D-glucose  Cystine arylamidase & D-glucose  Acid phosphatase & D-glucose  N-acetyl-β-glucosaminidase & D-glucose  Valine arylamidase & L-arabinose  N-acetyl-β-glucosaminidase & L-arabinose  Valine arylamidase & D-mannose  Valine arylamidase & D-mannitol  Acid phosphatase & D-mannitol  N-acetyl-β-glucosaminidase & D-mannitol  Lipase & Adipic acid  Valine arylamidase & Adipic acid  Lipase & Trisodium citrate | α-chymotripsin & Capric acid  α-chymotripsin & Adipic acid  α-chymotripsin & Trisodium citrate  α-chymotripsin & D-maltose | Lipase & D-mannose  α-Glucosidase & D-mannose |  | β-Glucosidase & Nitrite reduction  β-Glucosidase & Hydrolysis of Gelatin  β-Glucosidase & L-arabinose |

**Table S4. Mn cell trafficking putative genes sequences accession number list**

|  | | Accession number | | |
| --- | --- | --- | --- | --- |
| Related to | **Conserved Domain** | ***Dietzia maris*** | ***Loktanella cinnabarina*** | ***Rhodococcus Erythropolis*** |
| Cation diffusion facilitator (CDF) | **FieF** | LVFF01000032.1 | BATB01000030.1 BATB01000021.1 BATB01000017.1 | ACNO01000036.1 ACNO01000069.1 ACNO01000076.1 ACNO01000072.1 ACNO01000004.1 |
| P-type ATPase | **ZntA** | LVFF01000044.1 | BATB01000042.1 BATB01000021.1 BATB01000003.1 | ACNO01000116.1 ACNO01000104.1 ACNO01000057.1 (2hits) |
| Transcriptional regulator | **MntR** | LVFF01000053.1 | NQWH01000082.1 | ACNO01000032.1 |
